# Supplementary material
Source: publisher figshare collection journal article supplement (https://acs.figshare.com/ndownloader/files/34146251)
Supplement: Supplementary file 1 [file 34146251]

# Supporting Information

## Synergistic Effect of TMSPi and FEC in Regulating the Electrode/Electrolyte Interfaces in Nickel-Rich Lithium Metal Batteries

*Xiaoyan Zhang<sup>a, b, c</sup>, Yufei Ren<sup>b, c</sup>, Juyan Zhang<sup>b, d</sup>, Xiangkun Wu<sup>b, c</sup>, Chunhai Yi<sup>a</sup>,*

*Lan Zhang<sup>b, c\*</sup>, Suitao Qi<sup>a\*</sup>*

a Shaanxi Key Laboratory of Energy Chemical Process Intensification, School of Chemical Engineering and Technology, Xi'an Jiaotong University, Xi'an 710049, China

b CAS Key Laboratory of Green Process and Engineering, Beijing Key Laboratory of Ionic Liquids Clean Process, State Key Laboratory of Multiphase Complex Systems, Institute of Process Engineering, Chinese Academy of Sciences, Beijing 100190, PR China.

c Langfang Institute of Process Engineering, Chinese Academy of Sciences, Hebei 065001, PR China.

d Faculty of Engineering and Physical Sciences, Department of Chemical and Process Engineering, University of Surrey, Guildford, GU2 7XH, UK

Corresponding author Email address:

zhangl@ipe.ac.cn (Lan Zhang)

suitaoqi@mail.xjtu.edu.cn (Suitao Qi)

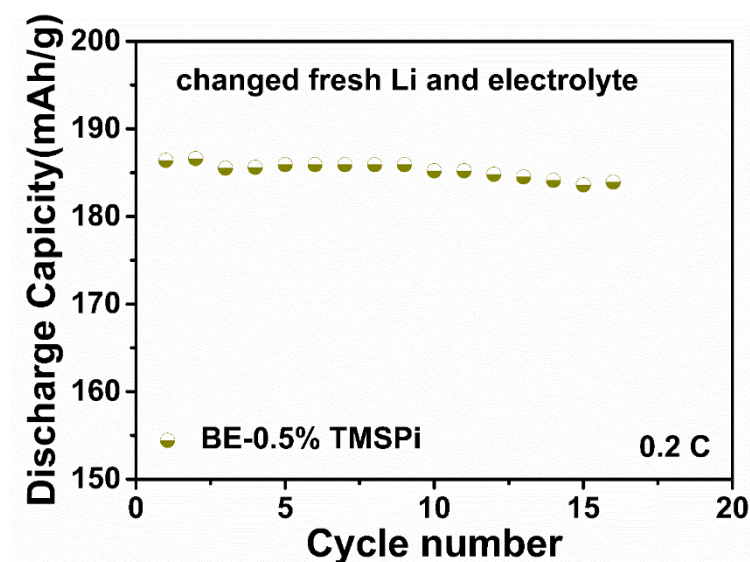

**Figure S1.** Charge/discharge profile of the reassembled NCM811||Li with BE-0.5% TMSPi.

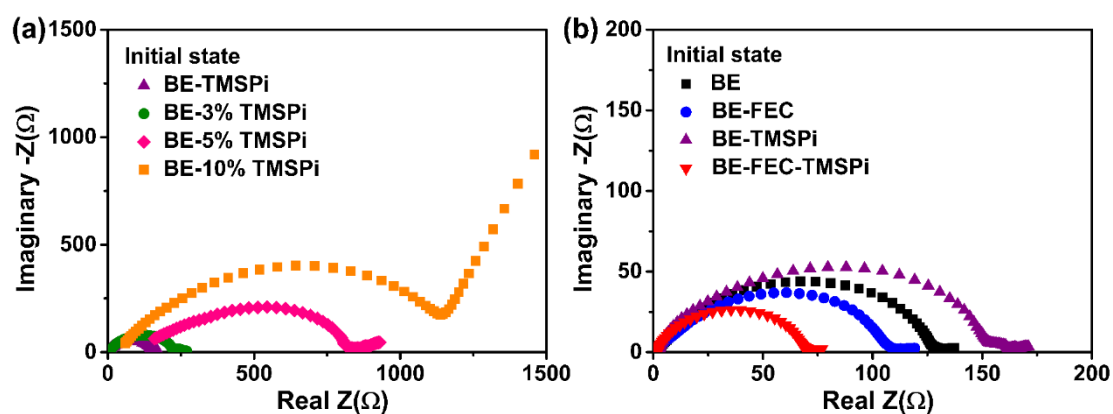

**Figure S2.** Nyquist plots of Li||Li symmetric cells after standing for 24 h (a) Electrolytes with different content of TMSPi. (b) Electrolytes in different additives.

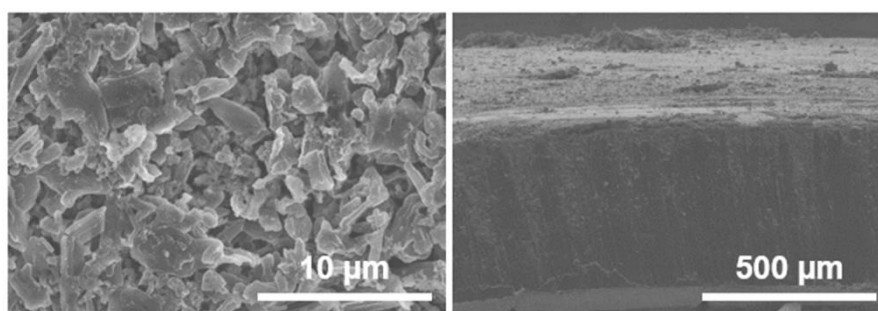

**Figure S3.** SEM pictures of lithium metal cycled in BE-TMSPi.

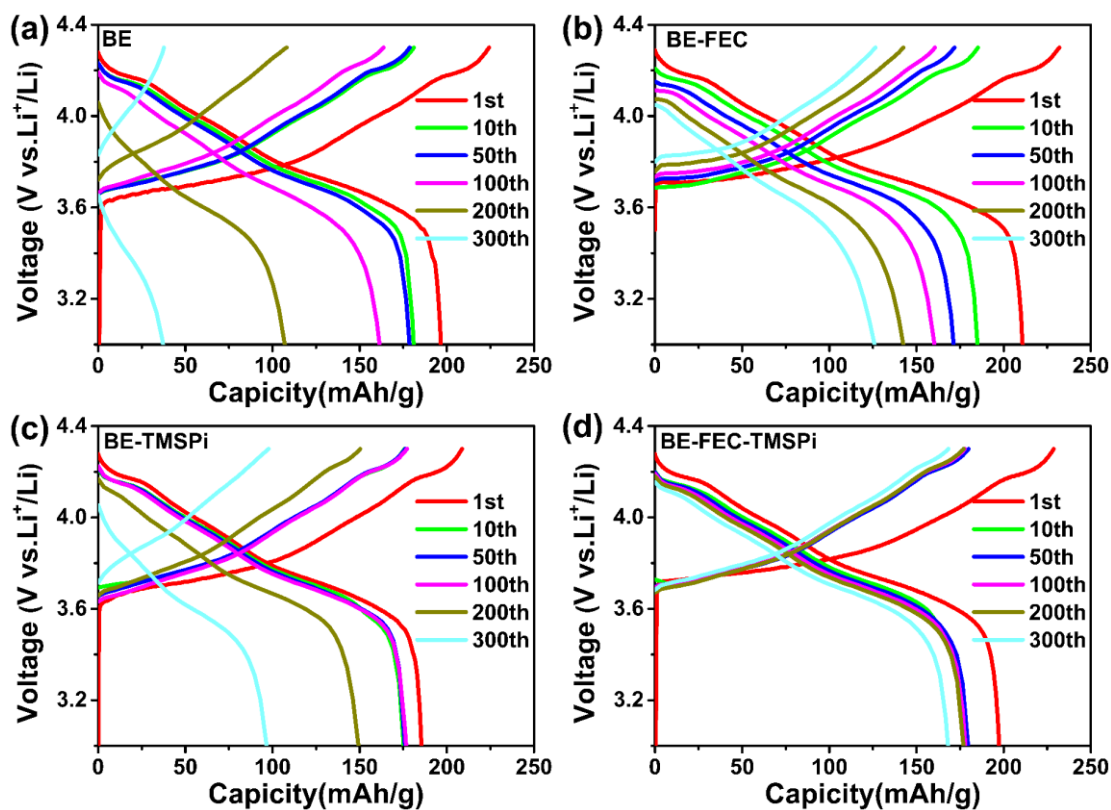

**Figure S4.** Voltage profiles of selected cycles of cells with different electrolytes: BE (a), BE-FEC (b), BE-TMSPi (c) and BE-FEC-TMSPi (d).

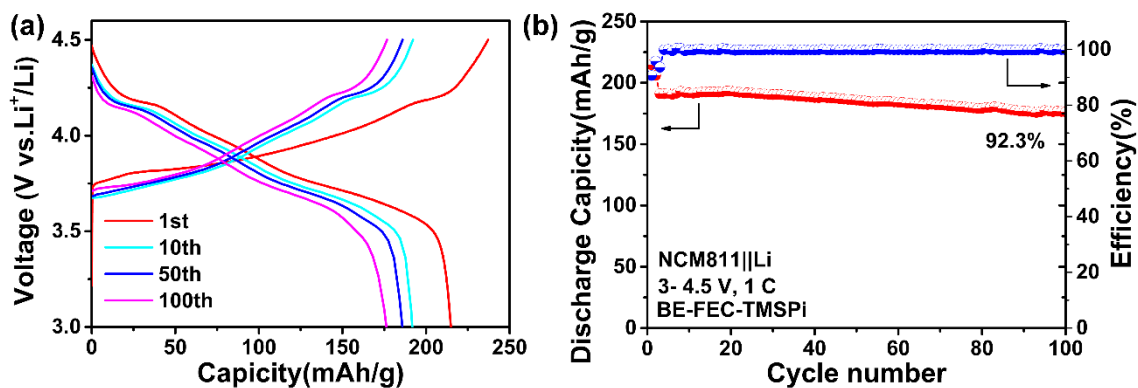

**Figure S5.** (a) Voltage profiles of selected cycles for the cell with BE-FEC-TMSPi; (b) Cycle performance of NCM811||Li cell in BE-FEC-TMSPi between 3 ~ 4.5 V at 1 C rate.

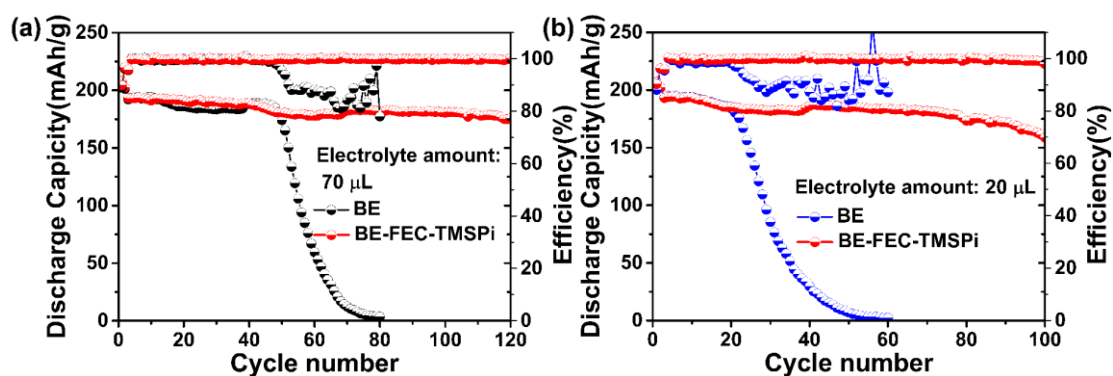

**Figure S6.** Cycle life test of LMBs full cells with the N/P of 7.1 (cathode:  $7.3 \text{ mg cm}^{-2}$ , anode:  $50 \text{ } \mu\text{m}$  Li foil) at  $0.5 \text{ C}$ . (a) with  $70 \text{ } \mu\text{L}$  electrolyte. (b) with  $20 \text{ } \mu\text{L}$  electrolyte.

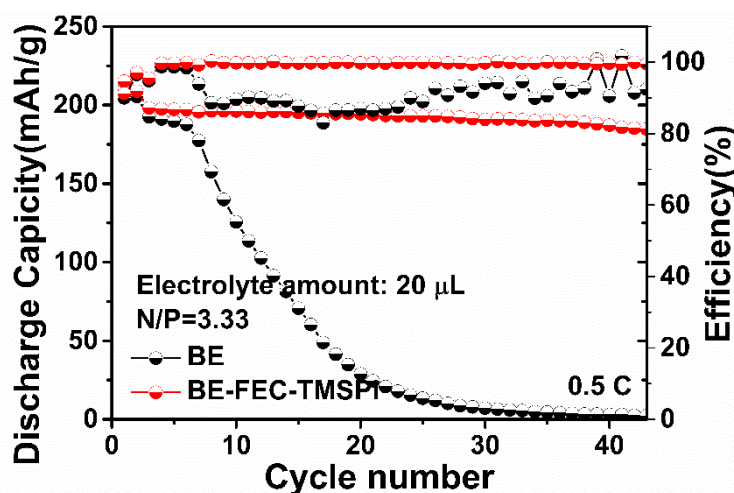

**Figure S7.** Cycle life test of LMBs full cells with the N/P of 3.3 (cathode:  $16.5 \text{ mg cm}^{-2}$ , anode:  $50 \text{ } \mu\text{m}$  Li foil) with  $20 \text{ } \mu\text{L}$  electrolyte at  $0.5 \text{ C}$  rate.

**Table S1** I(003)/I(104) value of fresh and cycled cathodes

| Sample       | I(003)/I(104) |
|--------------|---------------|
| Fresh        | 1.71          |
| BE           | 1.04          |
| BE-FEC       | 1.43          |
| BE-TMSPi     | 1.65          |
| BE-FEC-TMSPi | 1.45          |

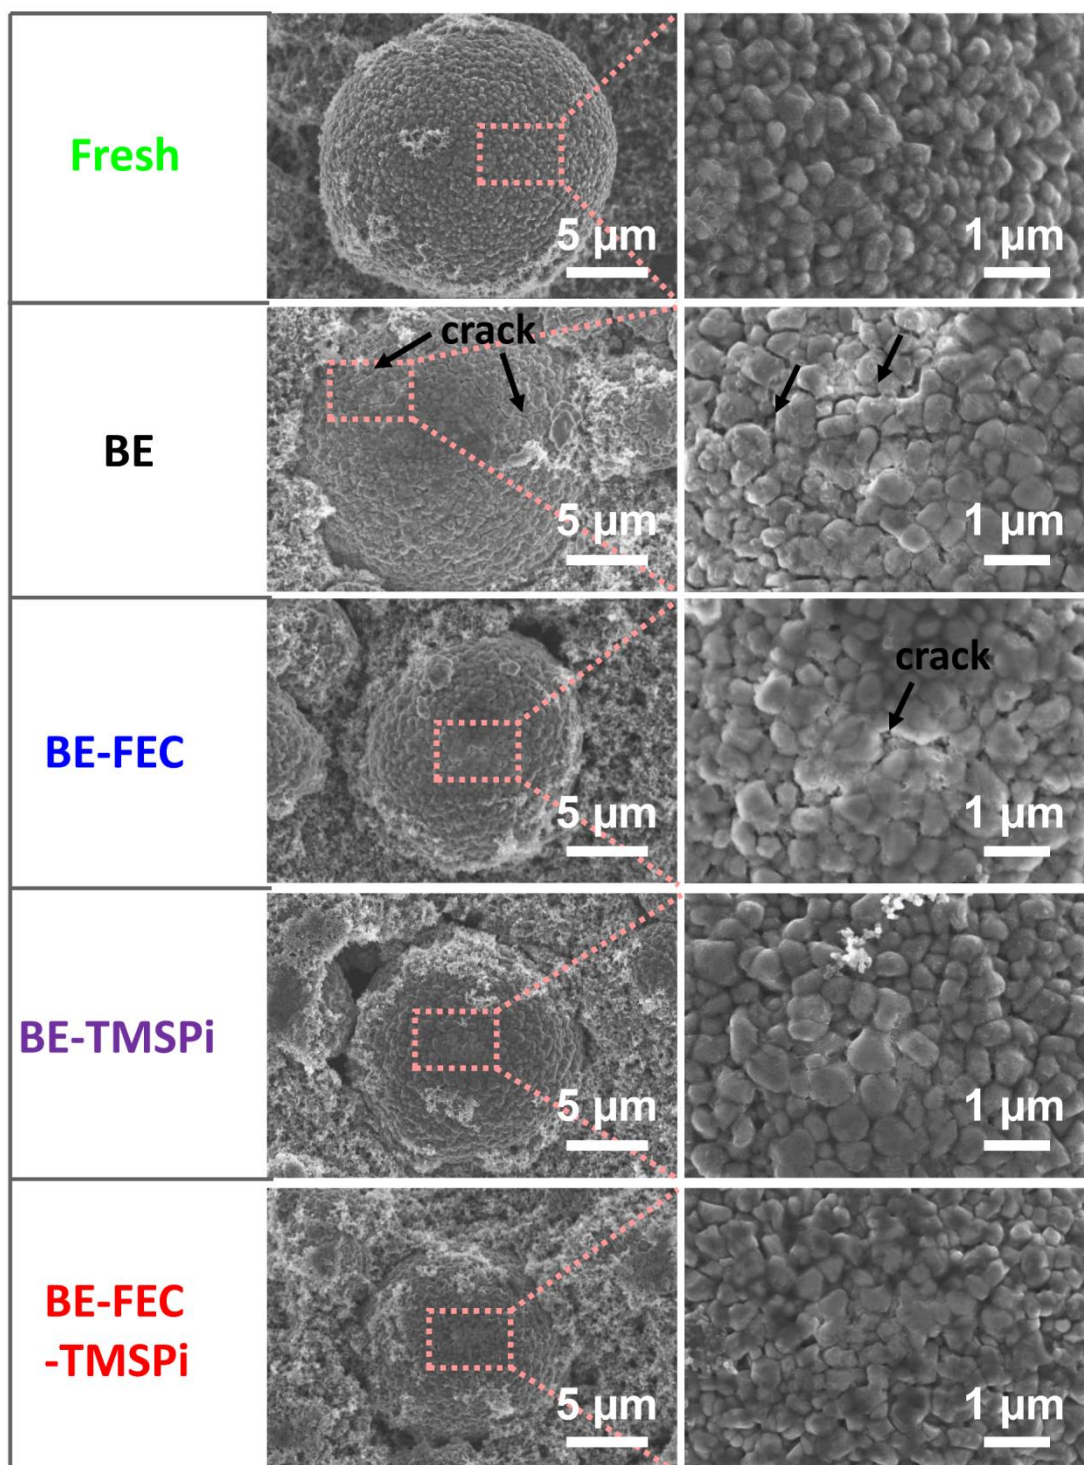

**Figure S8.** SEM images of Fresh NCM811 electrode and the cycled NCM811 electrode after 200 cycles at 1 C in various electrolytes.

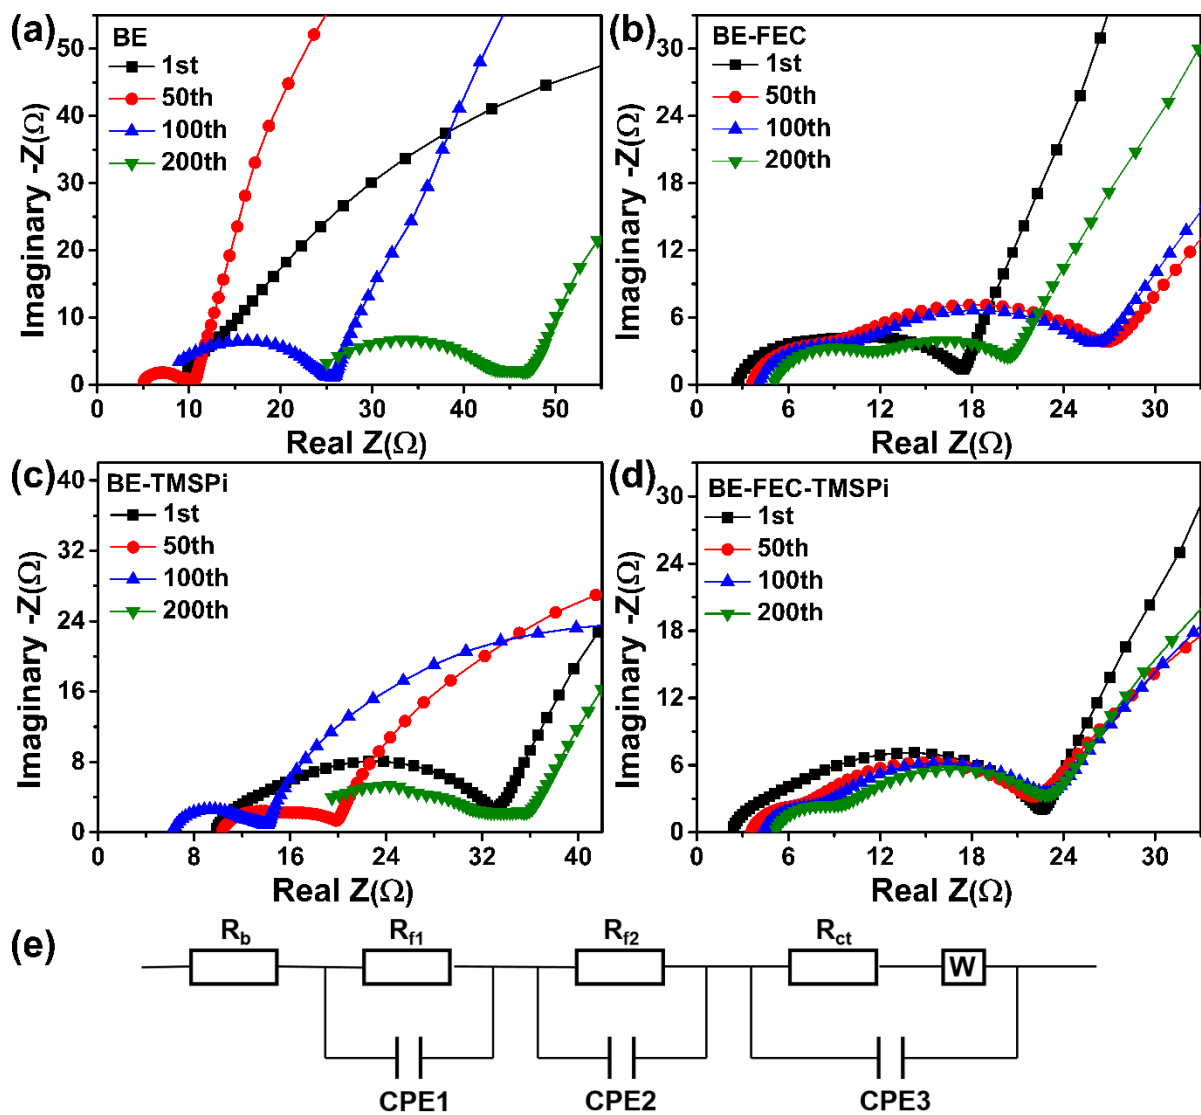

**Figure S9.** (a-d) An enlarged view of the high-frequency region and (e) the corresponding equivalent circuit.



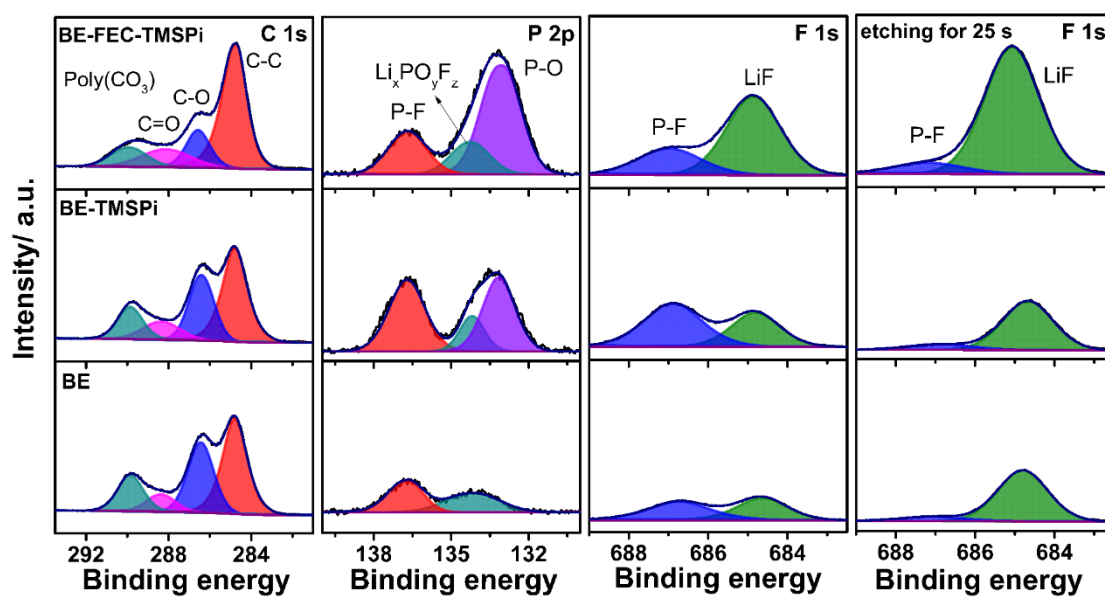

**Figure S10.** The surface and depth XPS spectra (C 1s, P 2p, F 1s) of Li metal anodes harvested from NCM811||Li cells after 50 cycles at 1 C in different electrolytes.

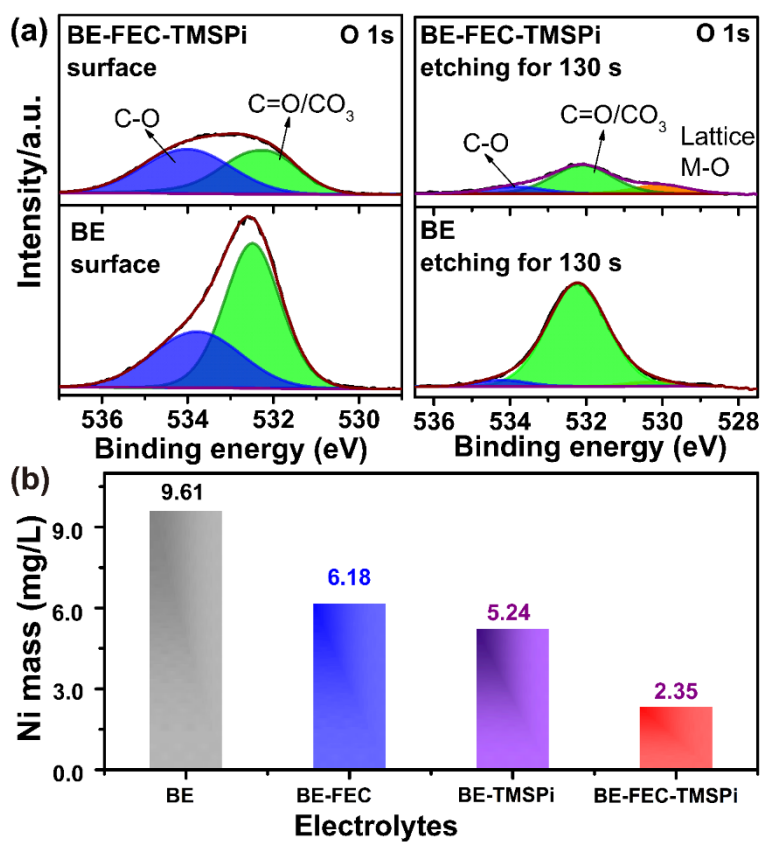

**Figure S11.** (a) O 1s in-depth XPS spectra s of NCM811 after 200 cycles in BE and BE-FEC-TMSPi. (b) Contents of Ni ions on lithium electrodes and separators from the NCM811||Li cells after 200 cycles in different electrolytes.
